# Supplementary material for: Diatom Red List Species Reveal High Conservation Value and Vulnerability of Mountain Lakes
Source: MDPI journal article supplement (doi:10.3390/d14050389), 2022-05-14
Supplement: s1 [file s1]

**Supplementary Materials:** The following supporting information can be downloaded at: [www.mdpi.com](http://www.mdpi.com)

**Table S1:** Average values and variation of the assessed environmental parameters.

**Figure S1:** The number of RL species (N<sub>rl</sub>) increases along the magnesium (Mg) gradient for sedimentary (a) and (b) littoral assemblages; no significant relationship was found for planktic assemblages (c). Model parameters are given for GAMs.

**Figure S2:** The number of diatom taxa according to their threat status within the German Red List (2018) is given for (a) the complete data set, (b) sedimentary assemblages, (c) littoral assemblages, (d) planktic assemblages and (e) true planktic assemblages.

**Table S1:** Average values and variation of the assessed environmental parameters.

| Parameter                         | Abbreviation    | Minimum | Maximum | Mean  | Median | Standard Deviation |
|-----------------------------------|-----------------|---------|---------|-------|--------|--------------------|
| Altitude (m a.s.l.)               | Alt             | 760     | 2469    | 1598  | 1600   | 429                |
| Lake area (ha)                    | Area            | 0.1     | 12      | 2.3   | 1.9    | 2.4                |
| Maximum depth (m)                 | Depth           | 1.3     | 20.7    | 7.8   | 5.5    | 5.9                |
| Secchi depth (m)                  | Sec             | 1.3     | 11.3    | 4.6   | 4.2    | 2.5                |
| Nitrate-N (mg/l)                  | NO <sub>3</sub> | 0.03    | 2.86    | 0.44  | 0.33   | 0.5                |
| Total phosphorous (µg/l)          | TP              | 1       | 20.41   | 6.92  | 6.62   | 4.6                |
| Silicate-Si (mg/l)                | Si              | 0.12    | 0.77    | 0.22  | 0.18   | 0.15               |
| Ammonia-N (µg/l)                  | NH <sub>4</sub> | 3.84    | 126.85  | 36.45 | 25.29  | 27.49              |
| Sodium (mg/l)                     | Na              | 0.1     | 2.11    | 0.38  | 0.23   | 0.42               |
| Calcium (mg/l)                    | Ca              | 12.44   | 49.24   | 28.87 | 27.06  | 9.94               |
| Magnesium (mg/l)                  | Mg              | 0.98    | 19.47   | 7.12  | 6.34   | 4.8                |
| pH                                | pH              | 7.9     | 9       | 8.4   | 8.5    | 0.3                |
| Oxygen saturation (%)             | O <sub>2</sub>  | 5.1     | 129.8   | 93.4  | 96.9   | 23.8               |
| Conductivity (µS/cm)              | cond            | 121.4   | 536.7   | 226   | 208.6  | 78.2               |
| Ø August bottom temperature (°C)  | ABT             | 4.6     | 20.9    | 10    | 9.4    | 4                  |
| Ø August surface temperature (°C) | AST             | 8.8     | 22.6    | 15.1  | 14.9   | 3.1                |



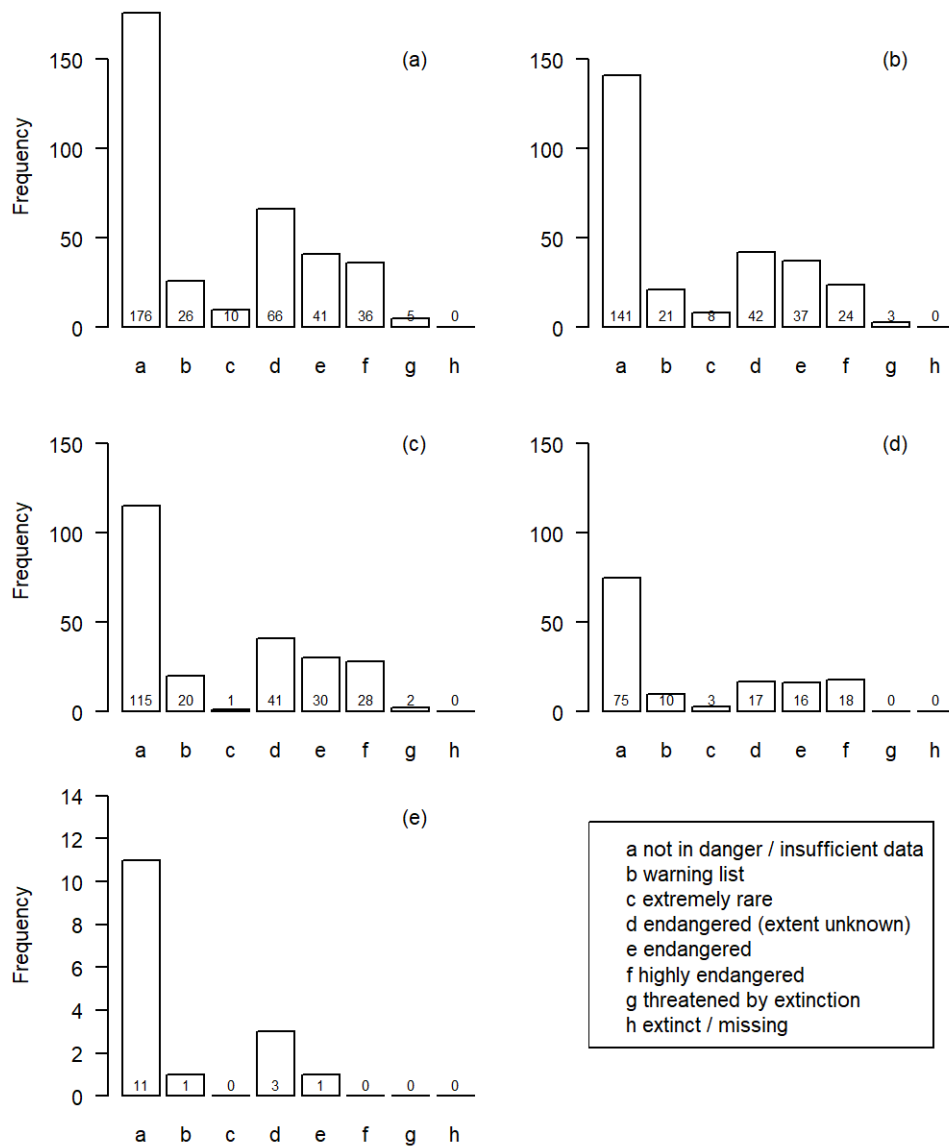

**Figure S2:** The number of diatom taxa according to their threat status within the German Red List (2018) is given for (a) the complete data set, (b) sedimentary assemblages, (c) littoral assemblages, (d) planktic assemblages and (e) true planktic assemblages.

**Information on fish stocking of lakes:**

Soinsee Süd: <https://bfv-mbteg.de/gewasser/soinsee/>

Taubensee: <https://www.fvu-chiemsee.de/gewaesser/taubensee/>

Soiernsee West: [https://www.sektion-hochland.de/fileadmin/user\\_upload/Dokumente/Archiv/Saiblinge.pdf](https://www.sektion-hochland.de/fileadmin/user_upload/Dokumente/Archiv/Saiblinge.pdf)

Lautersee: <http://www.fischereiverein-mittenwald.de/lautersee.html>

Other lakes: personal communication
